# Supplementary material
Source: publisher figshare collection journal article supplement (https://acs.figshare.com/ndownloader/files/5058697)
Supplement: Supplementary file 1 [file 5058697]

Supporting Information for:

**Synthesis and Characterization of Functionalized Mesoporous  
Silica by Aerosol-Assisted Self-Assembly**

Xiangling Ji<sup>1,3</sup>, Qingyuan Hu<sup>1</sup>, J. Eric Hampsey<sup>1</sup>, Xuepeng Qiu<sup>2</sup>, Lianxun Gao<sup>2</sup>, Jibao He<sup>3</sup>, Yunfeng Lu<sup>1\*</sup>

<sup>1</sup> *Department of Chemical and Biomolecular Engineering, Tulane University, New Orleans, LA 70118, USA*

<sup>2</sup> *Polymer Engineering Laboratory, Changchun Institute of Applied Chemistry, Chinese Academy of Sciences, Changchun 130022, China*

<sup>3</sup> *Central Instrumental Facilities, Tulane University, New Orleans, LA 70118, USA*

\* To whom the corresponding should be addressed. Phone: (504) 865-5827, Fax: (504) 865-6744, email: ylu@tulane.edu

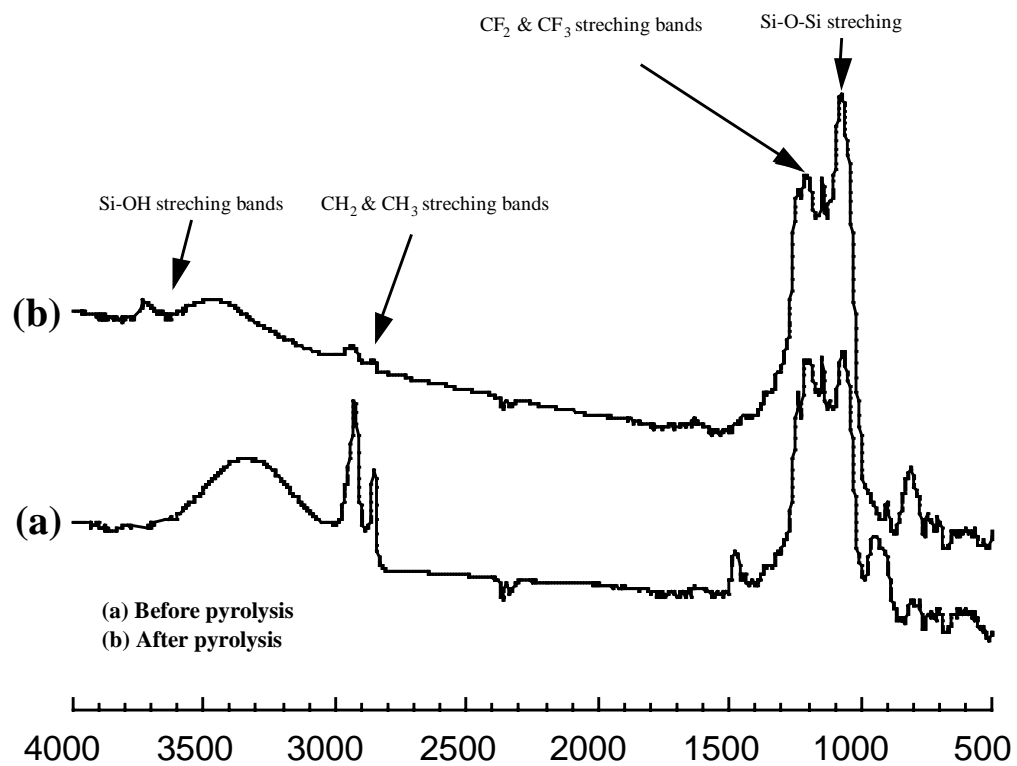

Figure S1. FT-IR spectra of the TFTS-modified silica particles before and after heat treatment at 350 °C for 5 hr in a nitrogen atmosphere.

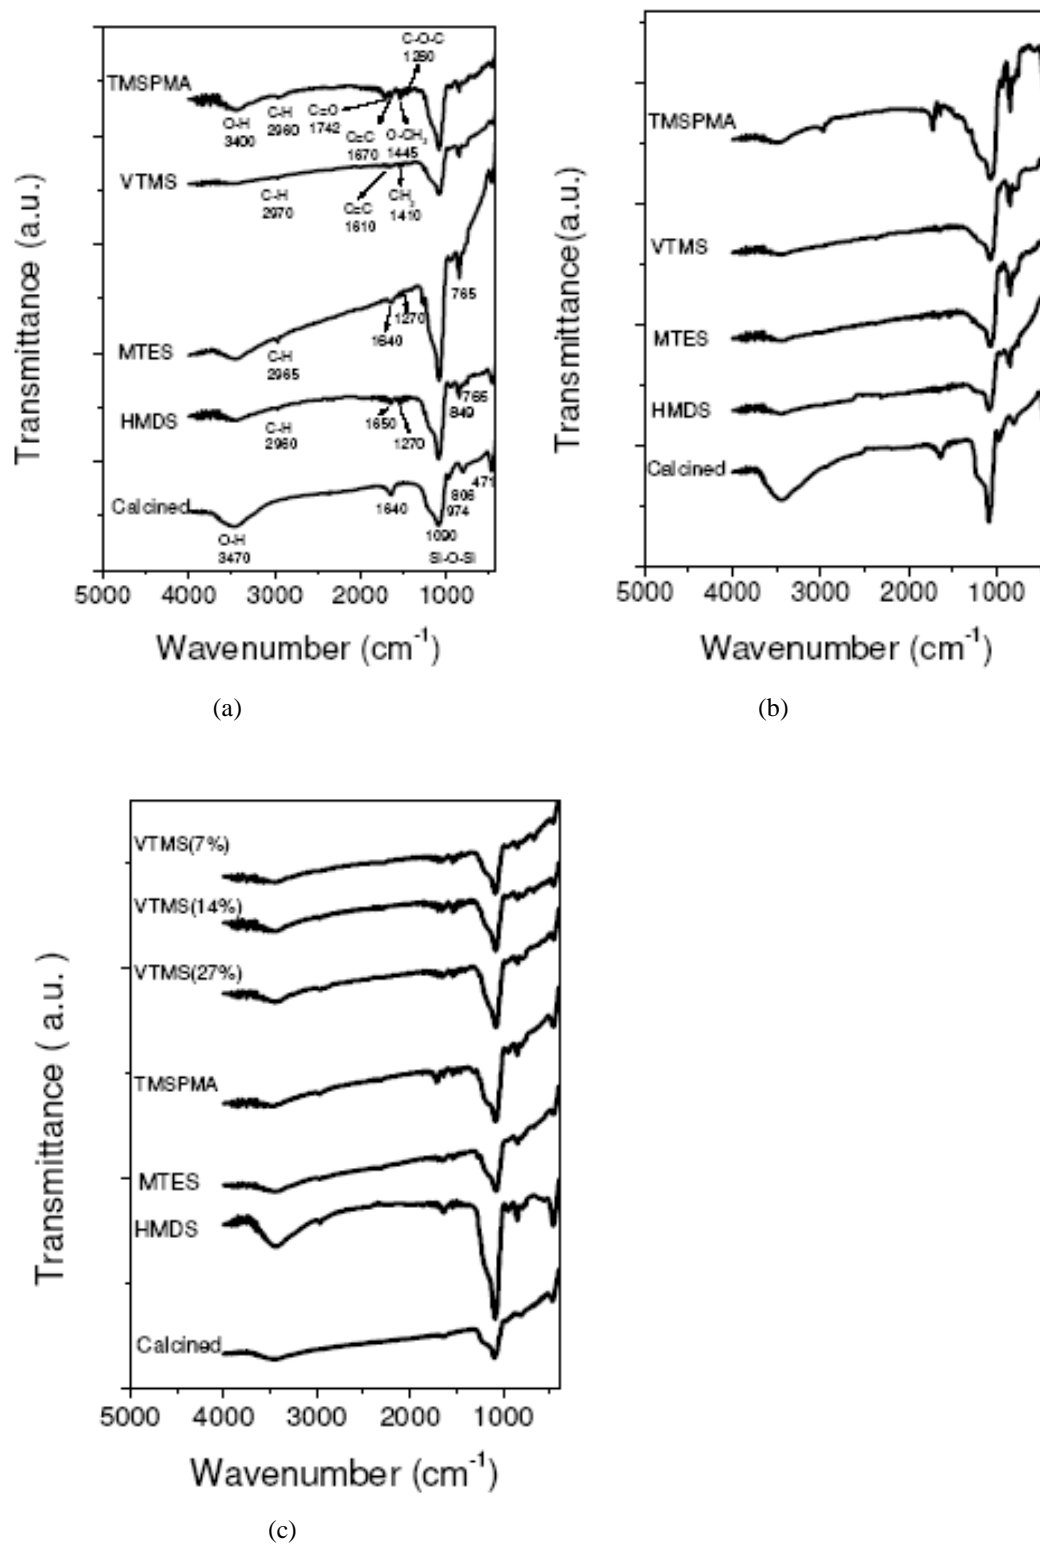

Figure S2. FT-IR spectra for organic functionalized silica particles, (a) Brij-56, (b) CTAB, (c) P123 as a template.

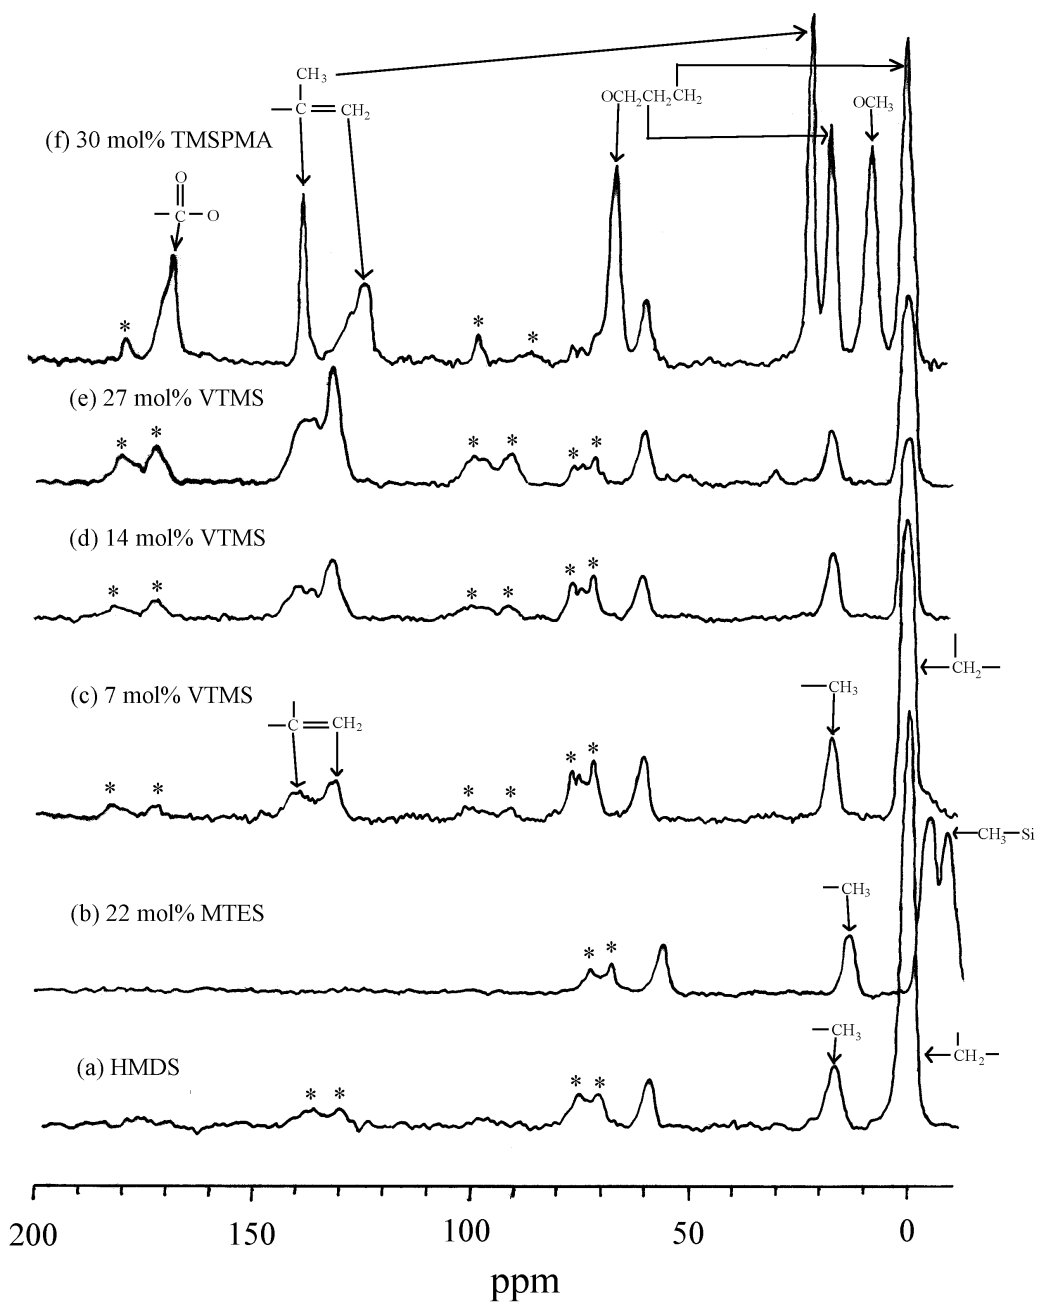

Figure S3. Solid-state  $^{13}\text{C}$  CP/MAS NMR spectra, (a) HMDS, (b) 22 mol% MTES, (c) 7 mol% VTMS, (d) 14 mol% VTMS, (e) 27 mol% VTMS, (f) 30 mol% TMSPMA, \* spinning side bands.

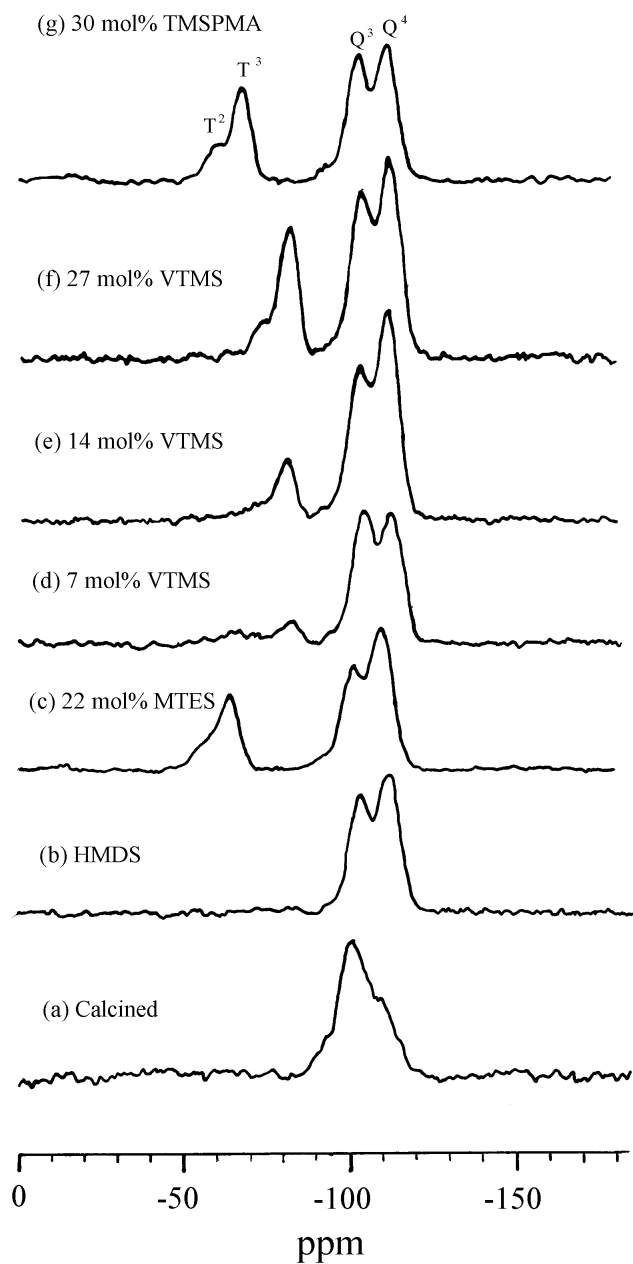

Figure S4. Solid-state  $^{29}\text{Si}$  MAS NMR spectra, (a) calcined at  $450^\circ\text{C}$  for 4 h, (b) HMDS, (c) 22 mol% MTES, (d) 7 mol% VTMS, (e) 14 mol% VTMS, (f) 27 mol% VTMS, (g) 30 mol% TMSPMA. (The cross-polarization (CP) contact time used in this study was 8 ms)

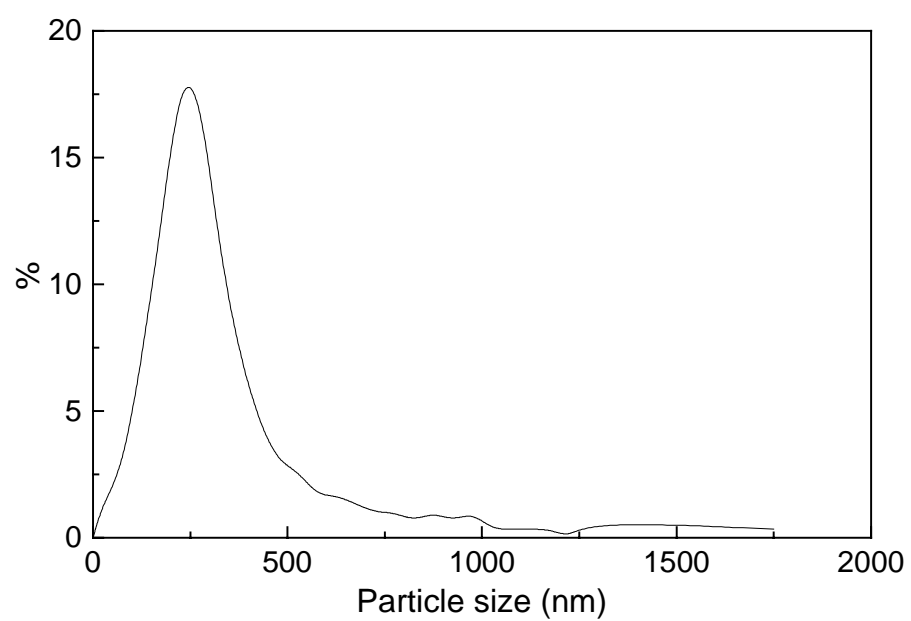

Figure S5 Particle size distribution of samples using P123 as a template
